# Supplementary material
Source: ML conference proceedings conference paper supplement (https://openaccess.thecvf.com/content/cvpr_2017/html/Shi_Learning_Non-Lambertian_Object_2017_CVPR_paper.html)
Supplement: Supplementary file 1 [file Shi_Learning_Non-Lambertian_Object_2017_CVPR_supplemental.pdf]

Archive with 2 entries (2 files):
- supp.pdf
- video.mp4
