# Supplementary material
Source: ML conference proceedings conference paper supplement (https://openaccess.thecvf.com/content/cvpr_2017/html/Shi_Learning_Non-Lambertian_Object_2017_CVPR_paper.html)
Supplement: Supplementary file 1 [file Shi_Learning_Non-Lambertian_Object_2017_CVPR_supplemental.pdf › supp.pdf]

# Learning Non-Lambertian Object Intrinsic across ShapeNet Categories

## Supplementary Material

Jian Shi

SKLCS, Institute of Software, Chinese Academy of Sciences  
University of Chinese Academy of Sciences

shij@ios.ac.cn

Hao Su

Stanford University

haosu@cs.stanford.edu

Yue Dong

Microsoft Research Asia

yuedong@microsoft.com

Stella X. Yu

UC Berkeley / ICSI

stellayu@berkeley.edu

### 1. Network

We propose an encoder-decoder CNN for intrinsic image decomposition. The basic network structure is shown in Figure 1. Figure 1 shows the feature size in each encoder/decoder layer. The network design is mirrored with symmetric feature sizes for the encoder and the decoder, as well as 3-channel RGB input and output intrinsic components ( $256 \times 256 \times 3$ ). To keep visual details and produce sharp outputs (e.g. CNNs as used by Direct Intrinsic [5] usually produce blurry results), we **link** early features in encoder layers to corresponding decoder layers of the same size (red arrows in the figure). Therefore, we call our network **Mirror-Link CNN**.

We build our network with simple layers. For the encoder, we only use a convolutional layer with  $3 \times 3$  kernel and stride 2 to extract features for each level (every

conv layer is followed by BN and ReLU). For the decoder, we first up-sample the previous layer’s feature maps (unnecessary for the first decoder layer), and then concatenate them with their encoder counterpart. After that, features are passed through a Conv( $3 \times 3$ )-BN-ReLU sequence.

We use shared encoder and separate decoders, since intrinsic components (albedo, shading and specular) are not independent of each other. To further strengthen the correlation between albedo, shading and specular, we link the features across decoders (blue arrows in the figure).

Some other networks use the same idea of skip links, e.g. U-Net [7] and Deep Reflectance Map [6]. However, our network is different from theirs in following three aspects: We target a different and more complex image-to-image regression problem; our network is strictly symmetric in feature maps, including input and output; we have three outputs/decoders with a shared input/encoder.

We evaluate many variations of the network, including: 1) independent Mirror-Link network for albedo, shading and specular, 2) shared encoder without cross links (blue arrows) between decoders; 3) different numbers of skip links (red arrows) between corresponding encoder and decoder. Table 1 lists benchmark errors.

**Analysis.** By comparing *Independent* and *Shared Encoder* networks, we observe that although the latter contains fewer parameters, the performance is comparable for albedo and shading, even better for specular. Therefore, we consider a single shared encoder sufficient for extracting features for all 3 outputs.

As a multi-task CNN, there are some correlations among our 3 intrinsic components. Therefore, in *Mirror-Link* network, we further strengthen such correlations by cross links in the decoders. The performance is improved significantly.

To evaluate the skip links from the encoder to the decoder, we test *Skip Link-3* and *Skip Link-0*. In *Skip Link-*

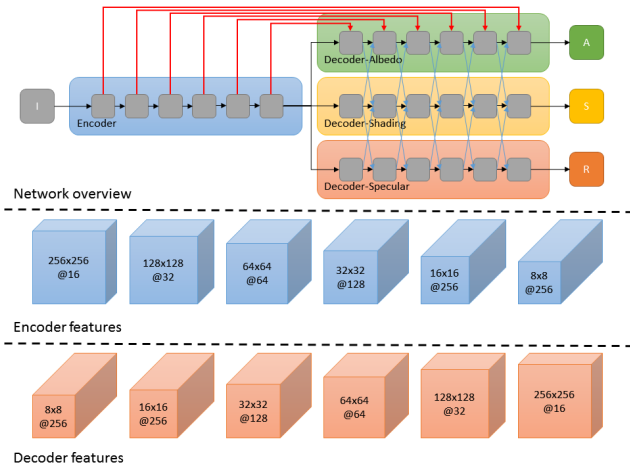

Figure 1: Network Structure.

|                    | Albedo        |               |               | Shading       |               |               | Specular      |               |               |
|--------------------|---------------|---------------|---------------|---------------|---------------|---------------|---------------|---------------|---------------|
|                    | MSE           | LMSE          | DSSIM         | MSE           | LMSE          | DSSIM         | MSE           | LMSE          | DSSIM         |
| Independent        | 0.0116        | 0.0469        | 0.1183        | 0.0059        | 0.0111        | 0.0667        | 0.0064        | 0.0845        | 0.1179        |
| Shared Encoder     | 0.0122        | 0.0503        | 0.1210        | 0.0069        | 0.0124        | 0.0746        | 0.0058        | 0.0767        | 0.1077        |
| <b>Mirror-Link</b> | <b>0.0083</b> | <b>0.0353</b> | <b>0.0939</b> | <b>0.0055</b> | <b>0.0097</b> | <b>0.0622</b> | <b>0.0042</b> | <b>0.0578</b> | <b>0.0831</b> |
| Skip Links - 3     | 0.0127        | 0.0527        | 0.1282        | 0.0079        | 0.0149        | 0.0815        | 0.0059        | 0.0858        | 0.1152        |
| Skip Links - 0     | 0.0226        | 0.0794        | 0.1705        | 0.0118        | 0.0225        | 0.0977        | 0.0084        | 0.1234        | 0.1448        |

Table 1: Numeric comparison for variant network structures. *Independent* uses 3 independent encoder-decoder networks for albedo, shading and specular, nothing is shared. *Shared Encoder* uses the shared encoder and separate decoders, but without cross links (blue arrows in the figure) between decoders. *Skip Link-0* is the network without skip links (red arrows) between encoder and decoder. *Skip Link-3* uses 3 links in the middle. *Mirror-Link* contains all links and is the model we used in this paper. We use the same metrics as [5], where MSE is a scale-invariant version.

3, we remove 3 links outside while keep 3 in the middle. In *Skip Link-0*, we remove all the skip links (red arrows in the figure). We observe that skip links improve the performance.

## 2. Loss Functions

Similar to [5], a scale-invariant MSE (SMSE) loss, combined with standard MSE loss, is employed in our work. The SMSE first scales the predicted output and then compares MSE with the groundtruth.

$$SMSE(X, X_{gt}) = MSE(\alpha X, X_{gt}) \quad (1)$$

$$\alpha = \operatorname{argmin} MSE(\alpha X, X_{gt}) \quad (2)$$

Previous works assume that  $I = A \times S$ , making the scaling ambiguity in  $\alpha A$  and  $\frac{1}{\alpha} S$ . In our formulation for non-Lambertian objects as  $I = A \times S + R$ , we also have the same scaling ambiguity for  $A \times S$ . Thus, we apply the scale-invariant loss for albedo and shading. However, for the specular  $R$ , either scale-invariant ( $\alpha R$ ) or shift-invariant ( $\alpha + R$ ) would bring different patterns to  $A \times S$ . Thus, we simply apply MSE loss for the specular output. Since we only have ground-truth for objects, we use masks for background pixels for computing the loss and back-propagating gradients.

For albedo and shading, we use

$$E_{A,S} = 0.95 \times SMSE + 0.05 \times MSE, \quad (3)$$

and for specular, we use:

$$E_R = MSE. \quad (4)$$

## 3. Rendering Pipeline

There are about 57,000 models in the ShapeNet core database [3]. Most of them have materials and textures. All these models are normalized and aligned to a unit bounding

box. Due to computing resource limitations, we only render 31,072 models, more than a half of the database.

A physics-based open source render Mitsuba [4] is employed for the rendering task. It can directly render the input image and the groundtruth albedo. For the shading component, we replace materials with pure diffuse white for rendering. For the specular, we set the diffuse to 0 and keep the specular for rendering.

Models are rendered under all 98 environment maps we have. Viewpoints are randomly assigned on the upper hemisphere for the object in each environment map. We use a low discrepancy Halton sequence to generate random viewpoints to keep them uniform yet random in the distribution.

We use path tracing to render images. To reduce the rendering time, we render albedo, shading and specular (as well as an object mask) and synthesize the image by  $I = A \times S + R$ . It saves us 30% of rendering time. Albedo and mask rendering is simple and fast, while image, shading and specular require many more samples for path tracing.

## 4. More Results

Pages 3-6 show some results from our synthetic testing set. Groundtruth (reference) is included for visual comparisons. Figure 2 shows results on real images downloaded from the Internet. Results from Direct Intrinsic [5] (both their released model and the model trained on our dataset) and SIRFS [1] are provided for visual comparisons.

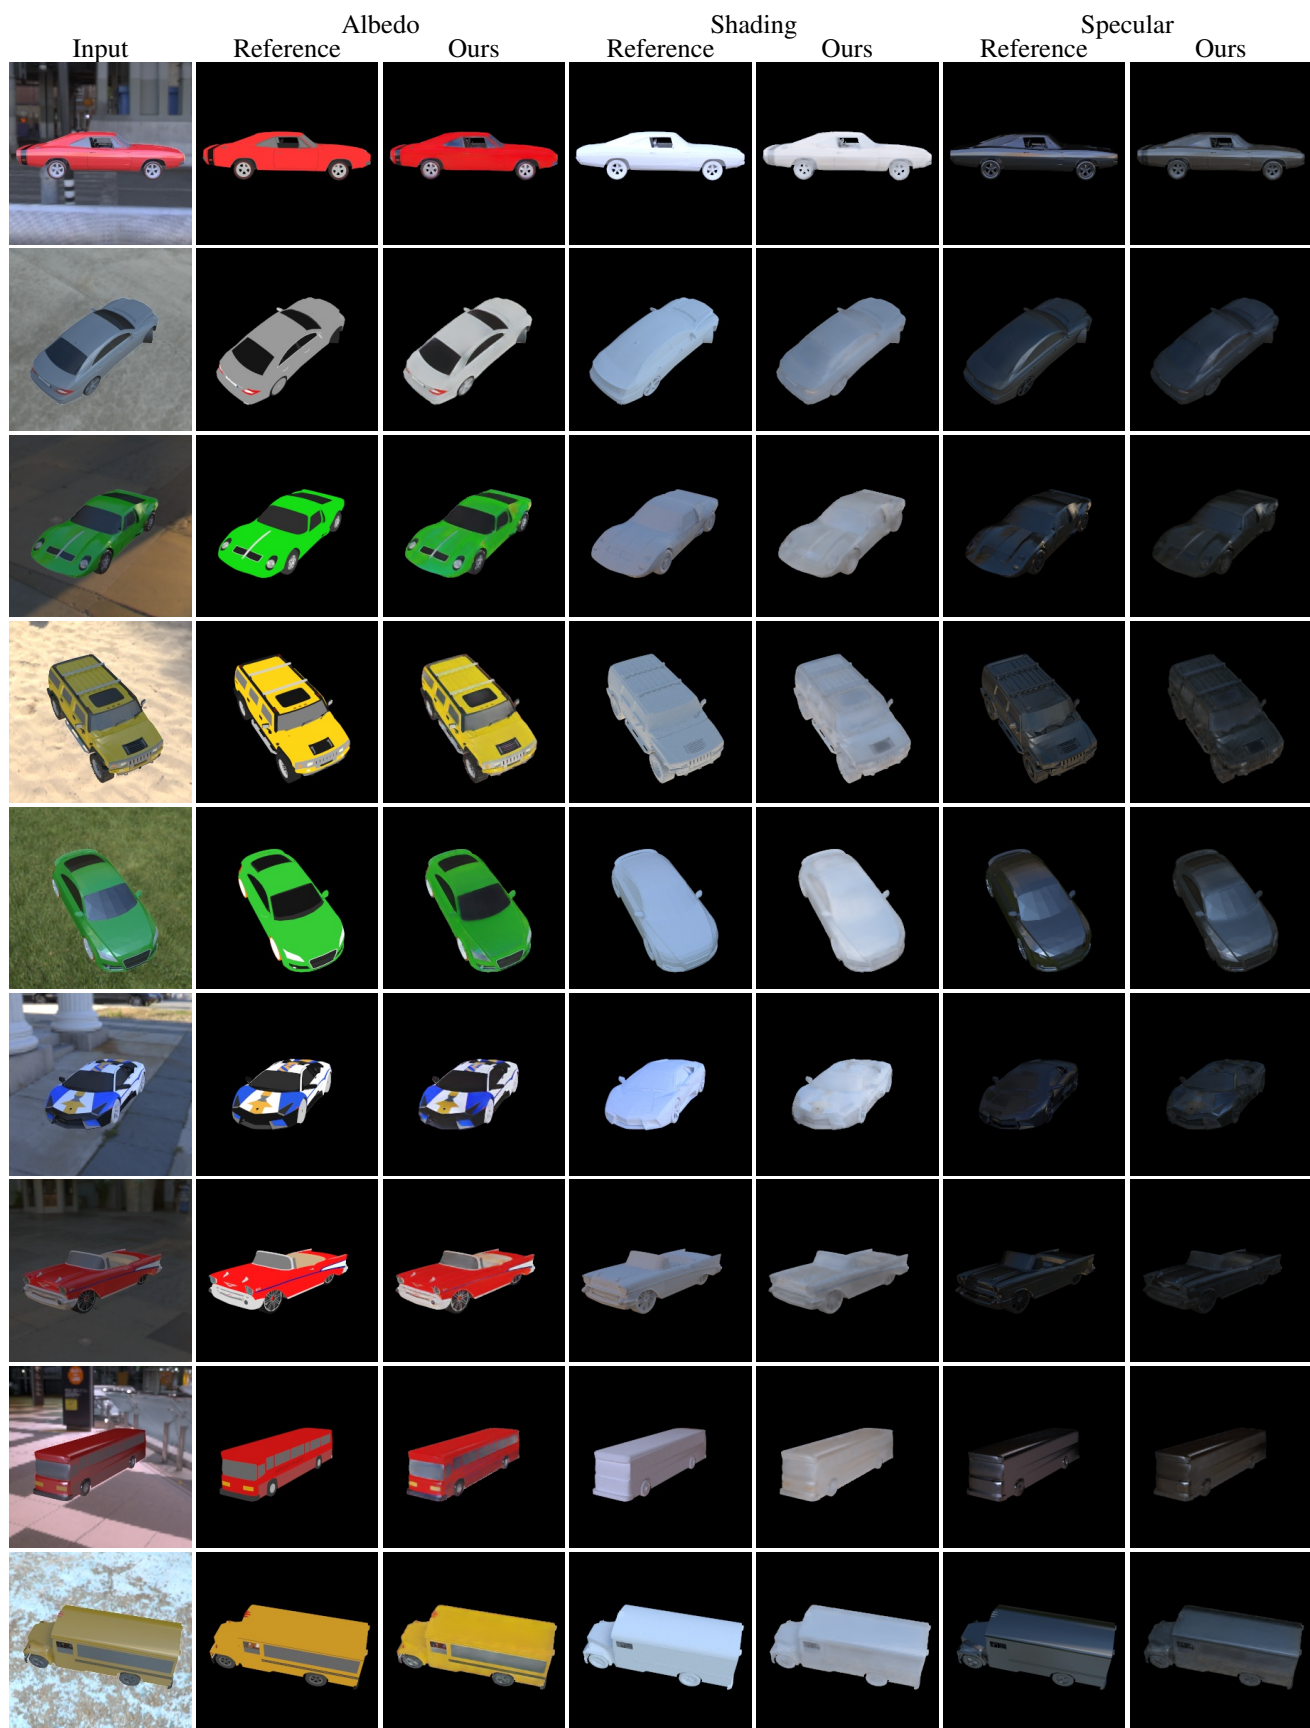

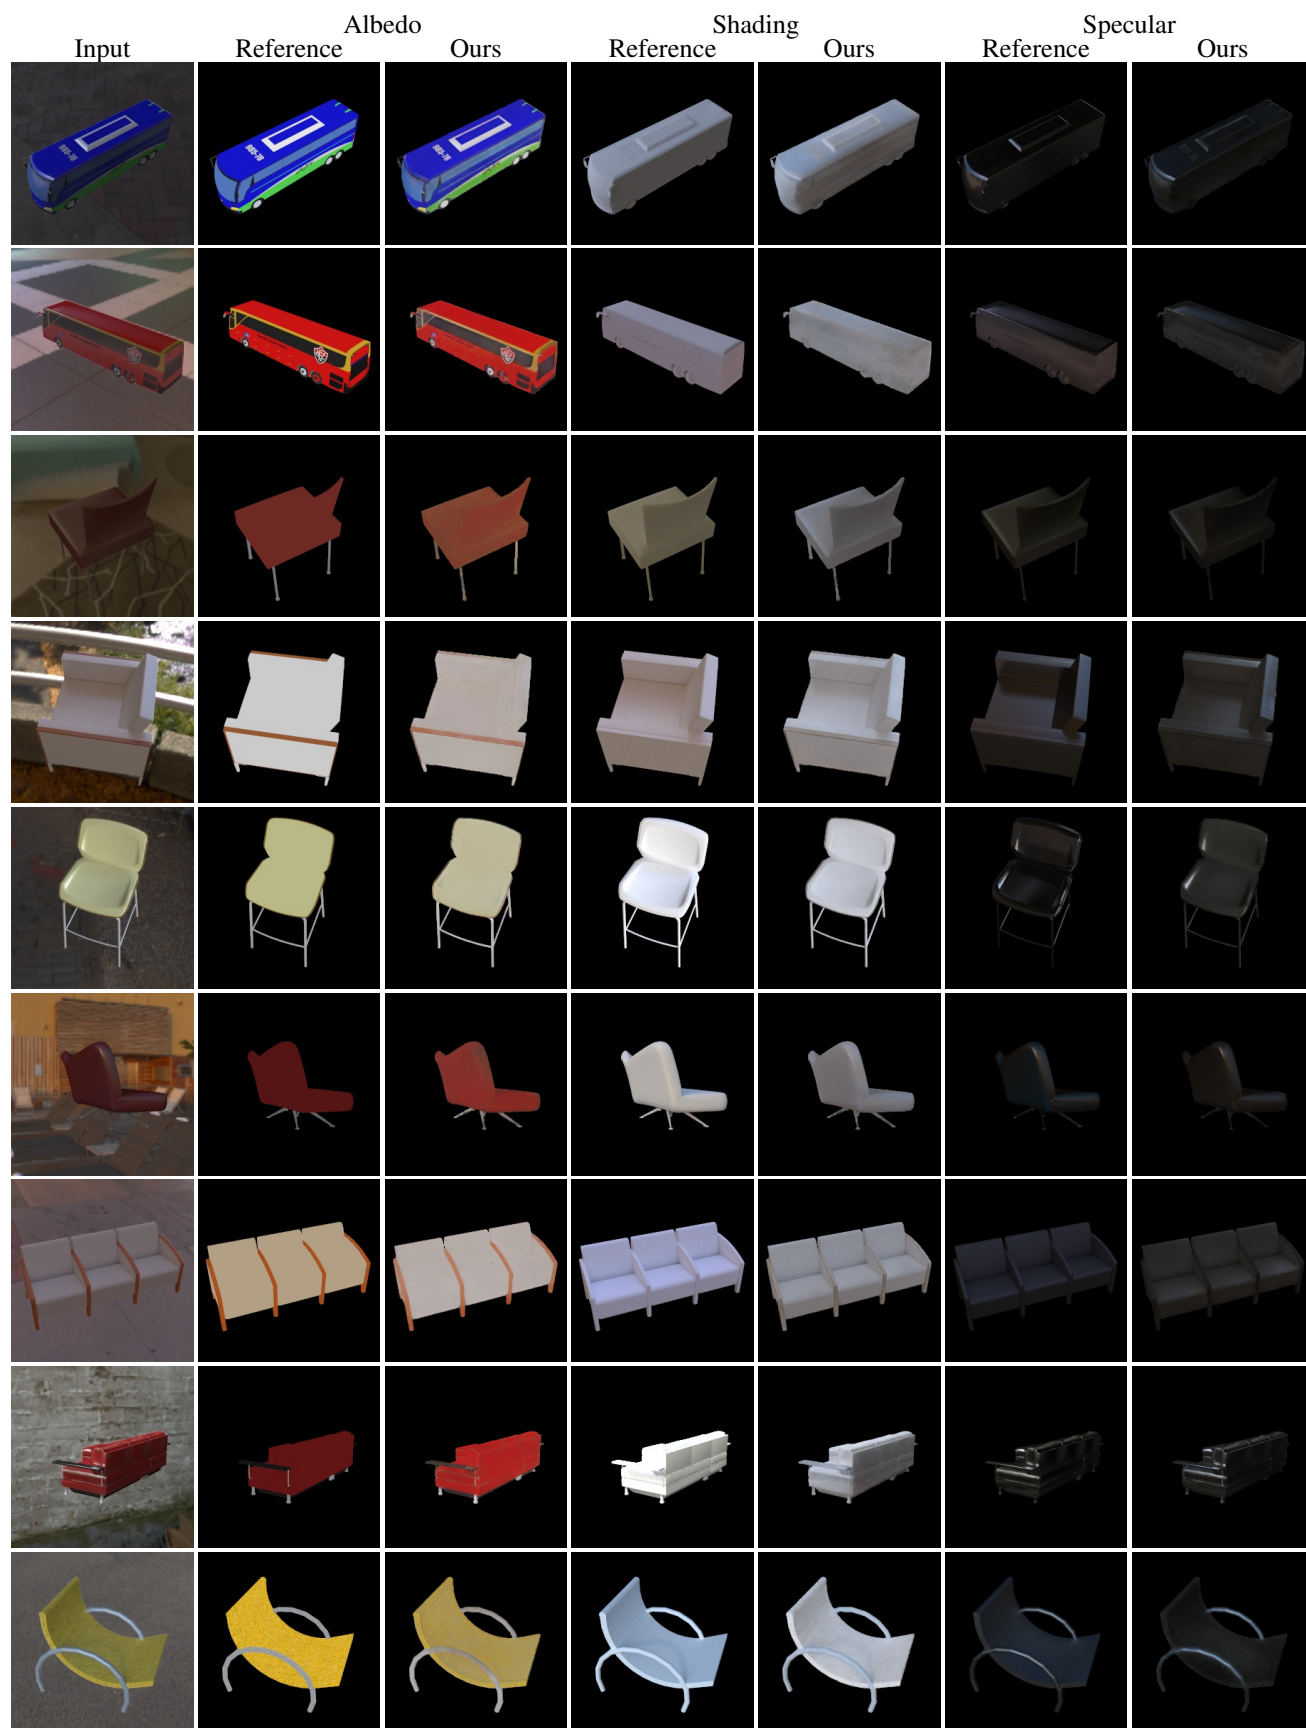

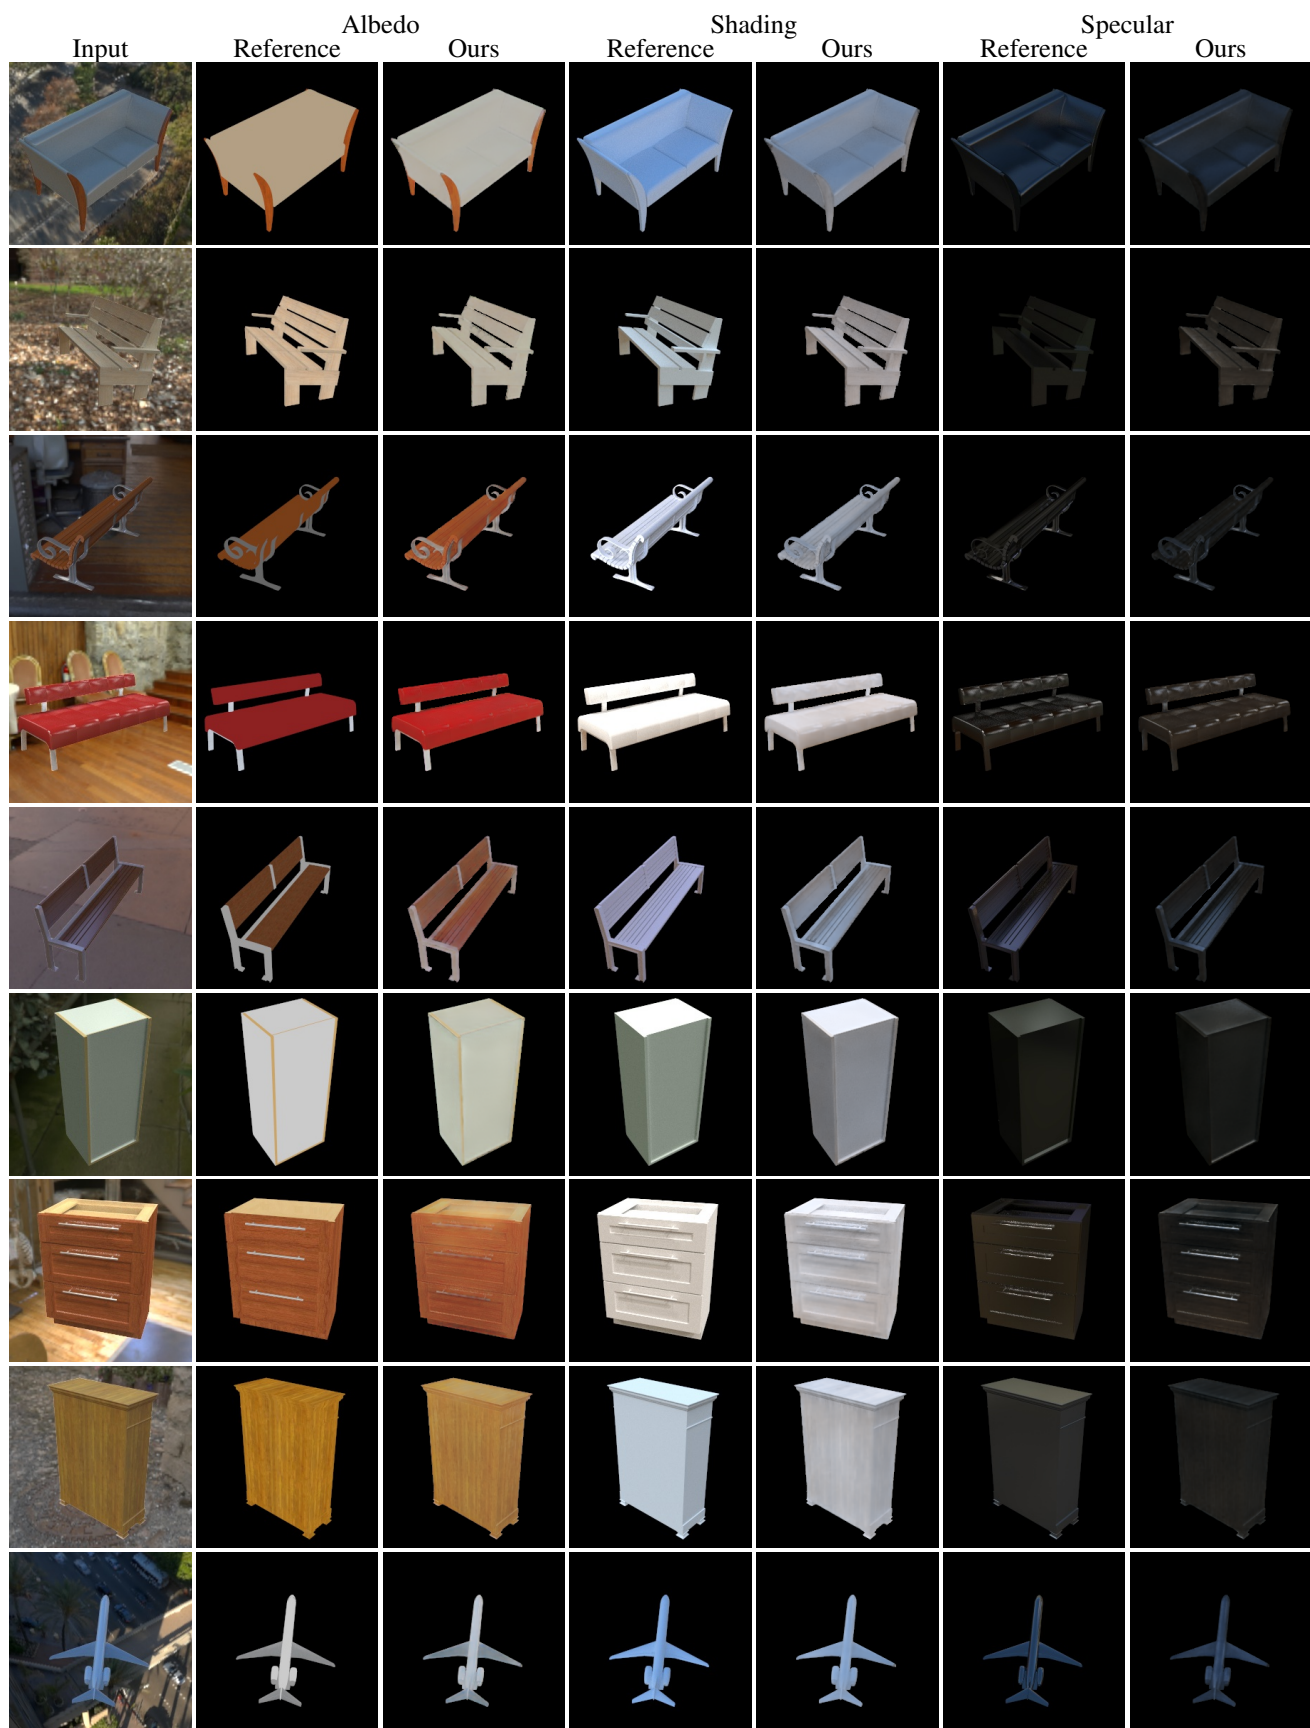

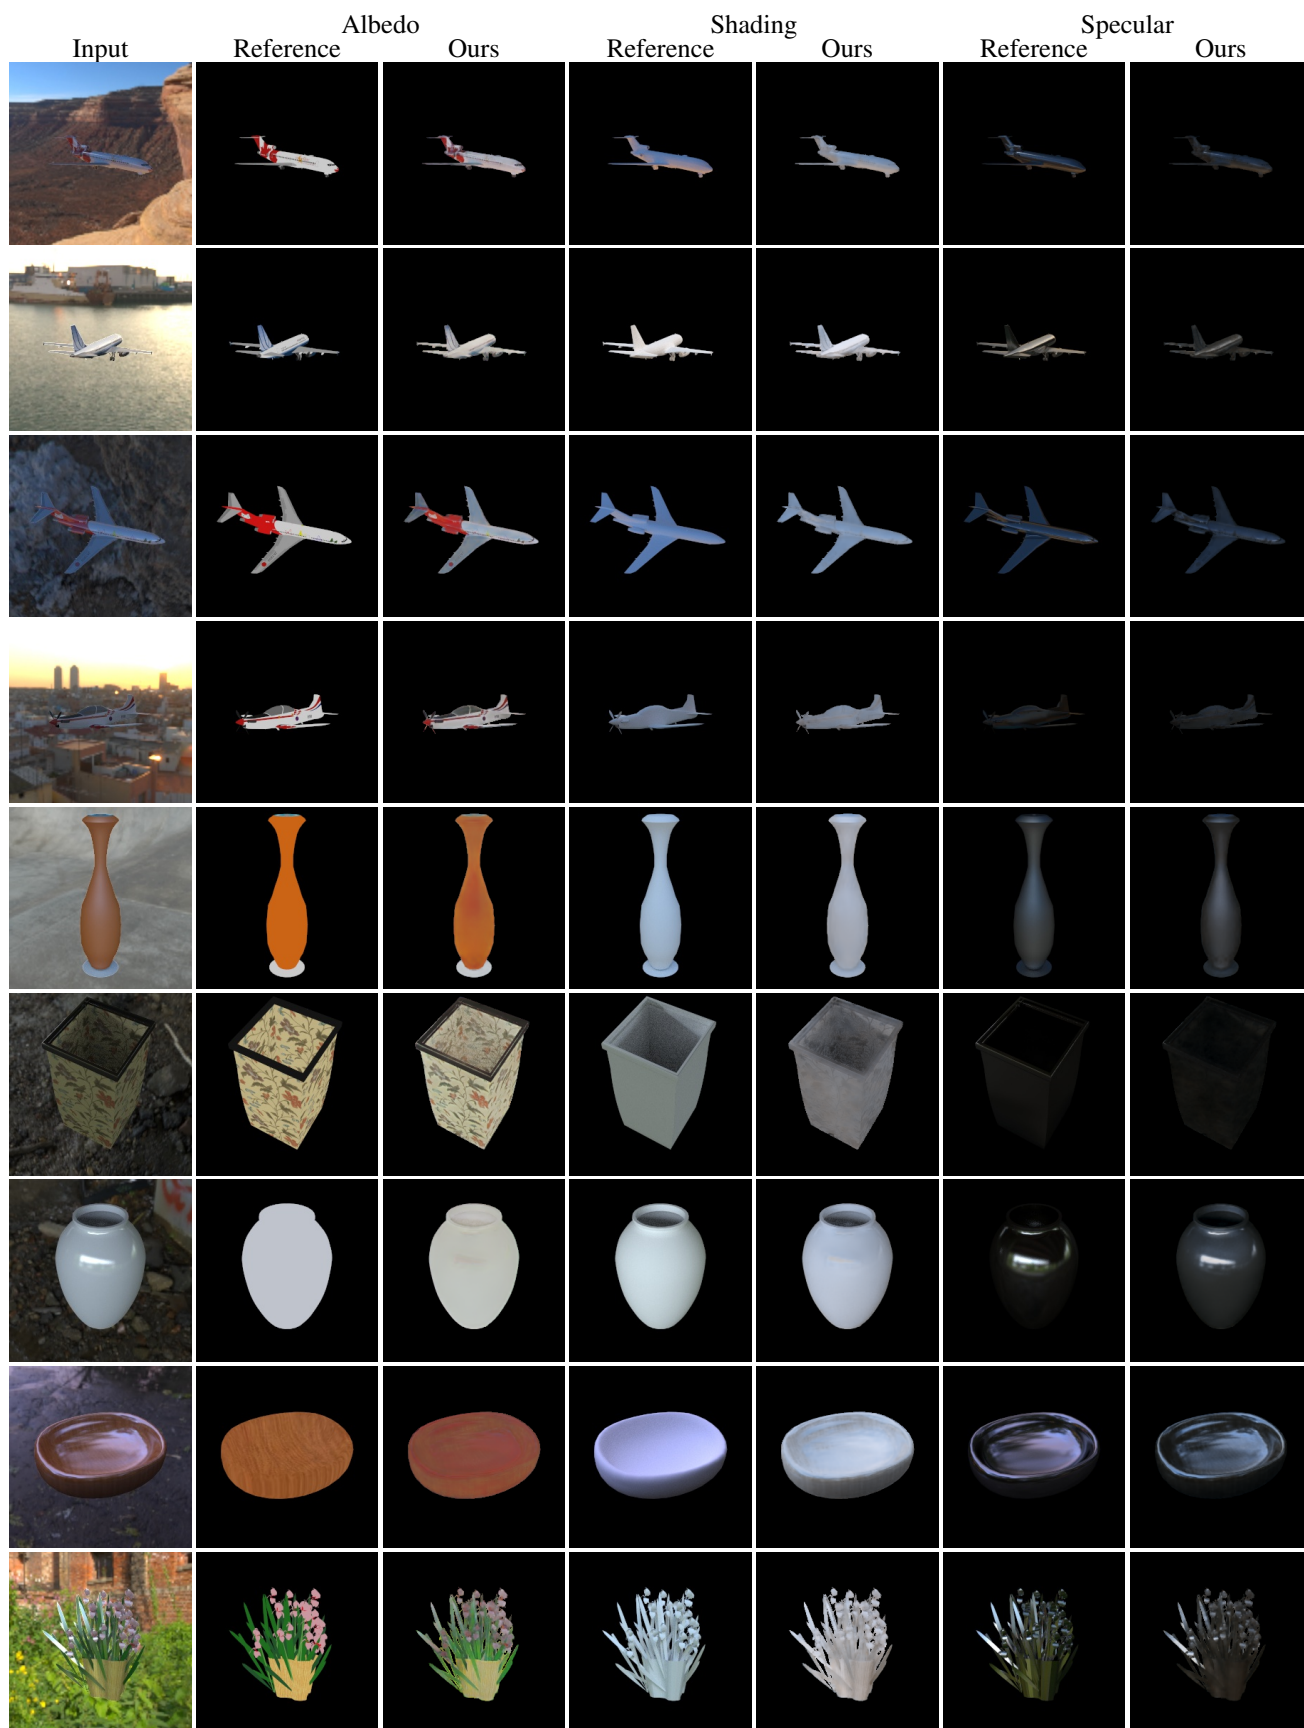

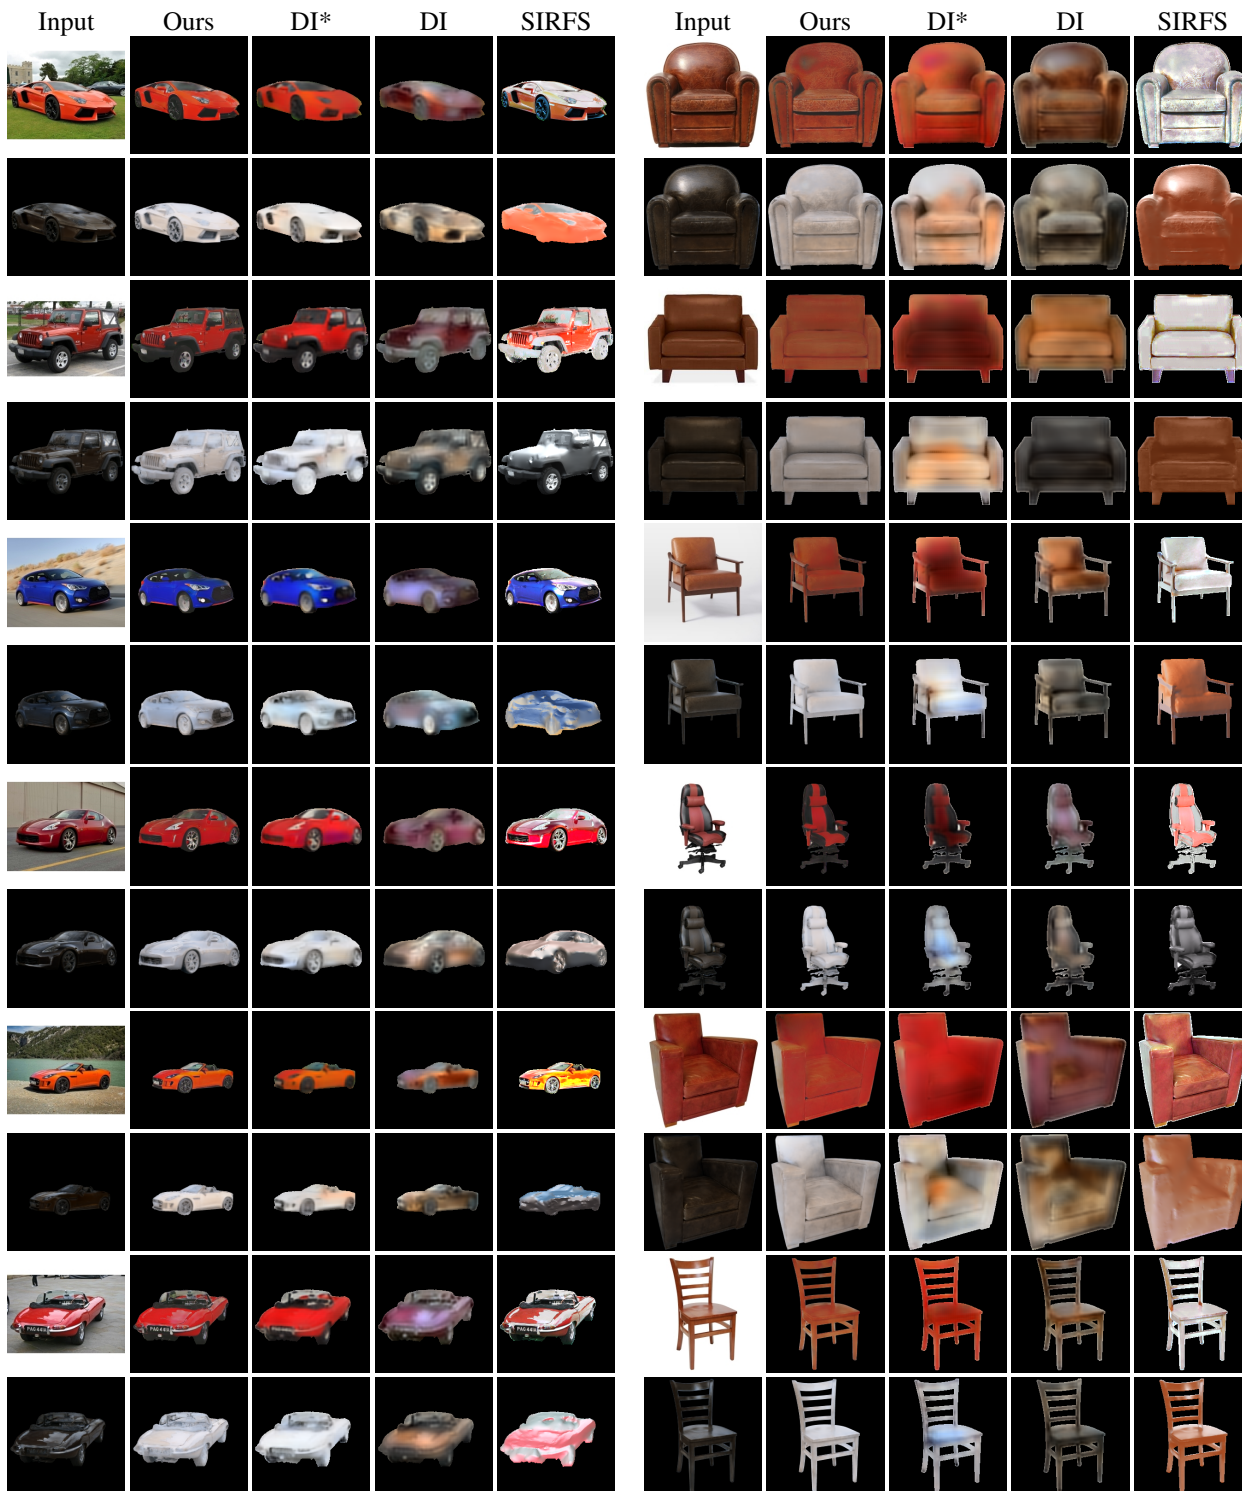

Figure 2: Real image results from our method, SIRFS, Direct Intrinsic(DI) and Direct Intrinsic model trained on our dataset(DI\*). The first column shows input image(top) and specular solved by our model(bottom). Other columns are albedo(top) and shading(bottom) results. We will publish our trained model as well as the synthetic dataset. For more results, please try our released model.

## 5. Another synthetic evaluation

We build an object-level intrinsic image dataset based on ShapeNet. Objects are rendered within real captured environment maps to approximate realistic illuminations. For more realistic and advanced effects such as occlusion and inter-reflection, rendering objects within 3D scenes is preferred. Figure 3 shows a photo-realistic rendered scene [2]. Unfortunately, there is no existing large-scale public realistic scene database for generating training data. However, we can still make use of those limited number of public 3D scenes to generate groundtruth data for evaluation.

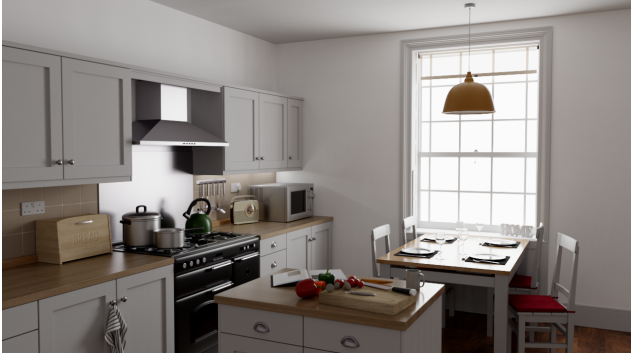

Figure 3: A rendered kitchen scene.

### 5.1. Pepper

The red and orange peppers on the table are rendered. There are sharp specular highlights, as well as inter-reflections from nearby objects. Figure 4 shows sample results. Table 2 lists estimation errors. Although there is no similar object in our training set, our method produces acceptable results especially for shading and specular.

|          |          | MSE           |               | LMSE          |               | DSSIM         |               |
|----------|----------|---------------|---------------|---------------|---------------|---------------|---------------|
|          |          | albedo        | shading       | albedo        | shading       | albedo        | shading       |
| Pepper-1 | SIRFS    | 0.0078        | 0.0110        | 0.1294        | 0.0179        | 0.3287        | 0.0959        |
|          | DI       | 0.0083        | 0.0093        | 0.0909        | 0.0091        | 0.3345        | 0.0530        |
|          | Ours     | <b>0.0058</b> | <b>0.0030</b> | <b>0.0883</b> | <b>0.0040</b> | <b>0.3219</b> | <b>0.0446</b> |
|          | specular | 0.0012        |               | 0.0162        |               | 0.0776        |               |
| Pepper-2 | SIRFS    | 0.0032        | 0.0255        | 0.1283        | 0.0146        | 0.3491        | 0.1054        |
|          | DI       | 0.0033        | 0.0147        | 0.0940        | 0.0052        | <b>0.3293</b> | 0.0760        |
|          | Ours     | <b>0.0022</b> | <b>0.0023</b> | <b>0.0789</b> | <b>0.0017</b> | 0.3302        | <b>0.0544</b> |
|          | specular | 0.0009        |               | 0.0114        |               | 0.0636        |               |
| Pepper-3 | SIRFS    | 0.0037        | 0.0033        | 0.1322        | 0.0035        | 0.1901        | 0.0308        |
|          | DI       | 0.0064        | 0.0077        | <b>0.0743</b> | 0.0055        | 0.2037        | 0.0682        |
|          | Ours     | <b>0.0006</b> | <b>0.0009</b> | 0.0963        | <b>0.0016</b> | <b>0.1789</b> | <b>0.0165</b> |
|          | specular | 0.0002        |               | 0.0090        |               | 0.0300        |               |

Table 2: Error comparison for peppers.

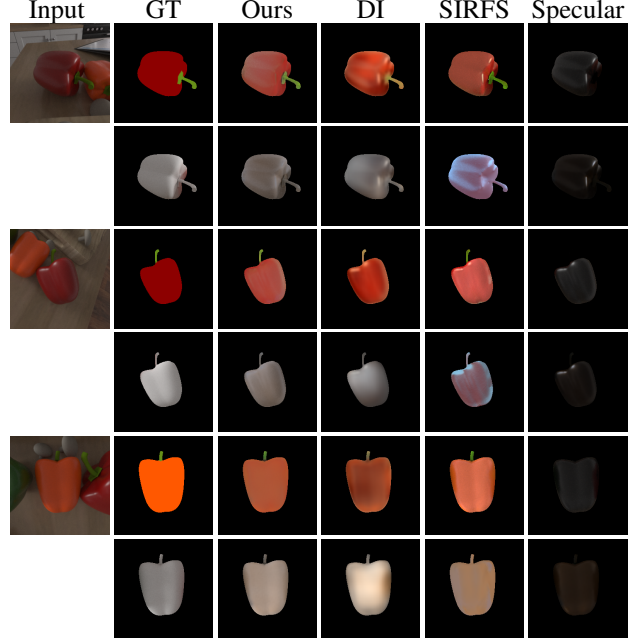

Figure 4: Visual results for the red pepper. The last column shows the groundtruth specular(top) and ours(bottom).

### 5.2. Kettle

The green metal kettle is also rendered for evaluation. In this case, the specular is not as sharp as the pepper, but with larger area. Figure 5 shows the visual results. Our algorithm produces reasonable specular and shading. For the albedo component, although our model failed to fill the correct color for the holes on the specular area, it still produces better results than others. Table 3 shows the numeric errors.

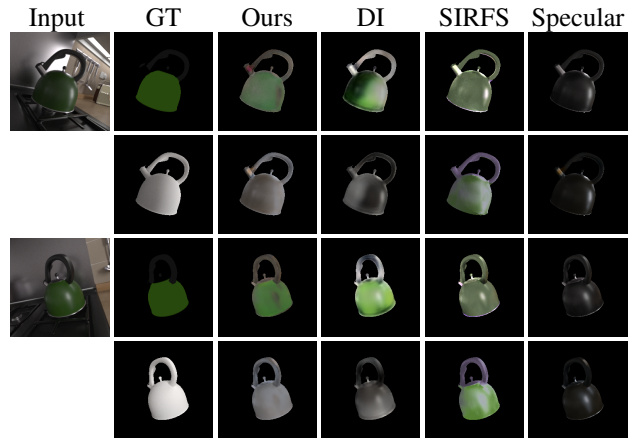

Figure 5: Visual results for the green kettle. The last column shows the groundtruth specular(top) and ours(bottom).

|          |          | MSE           |               | LMSE          |               | DSSIM         |               |
|----------|----------|---------------|---------------|---------------|---------------|---------------|---------------|
|          |          | albedo        | shading       | albedo        | shading       | albedo        | shading       |
| Kettle-1 | SIRFS    | 0.0076        | 0.0128        | 0.0890        | 0.0171        | 0.2912        | 0.0943        |
|          | DI       | 0.0112        | 0.0679        | 0.1275        | 0.0576        | 0.2882        | 0.1945        |
|          | Ours     | <b>0.0027</b> | <b>0.0063</b> | <b>0.0310</b> | <b>0.0103</b> | <b>0.2297</b> | <b>0.0737</b> |
|          | specular | 0.0015        |               | 0.0255        |               | 0.0439        |               |
| Kettle-2 | SIRFS    | 0.0060        | 0.0307        | 0.0777        | 0.0190        | 0.2851        | 0.1592        |
|          | DI       | 0.0042        | 0.0717        | 0.0508        | 0.0354        | 0.3295        | 0.2329        |
|          | Ours     | <b>0.0027</b> | <b>0.0101</b> | <b>0.0326</b> | <b>0.0091</b> | <b>0.2049</b> | <b>0.1254</b> |
|          | specular | 0.0009        |               | 0.0100        |               | 0.0273        |               |

Table 3: Error comparison for the kettle.

## 6. Intrinsic Video

We apply our model to each frame in a video, without any temporal consistency constraints across frames. It produces stable and reasonable results.

## References

- [1] J. T. Barron and J. Malik. Shape, illumination, and reflectance from shading. *IEEE transactions on pattern analysis and machine intelligence*, 37(8):1670–1687, 2015. 2
- [2] B. Bitterli. Rendering resources, 2016. <https://benedikt-bitterli.me/resources/>. 8
- [3] A. X. Chang, T. Funkhouser, L. Guibas, P. Hanrahan, Q. Huang, Z. Li, S. Savarese, M. Savva, S. Song, H. Su, J. Xiao, L. Yi, and F. Yu. ShapeNet: An Information-Rich 3D Model Repository. Technical Report arXiv:1512.03012 [cs.GR], Stanford University — Princeton University — Toyota Technological Institute at Chicago, 2015. 2
- [4] W. Jakob. Mitsuba renderer, 2010. <http://www.mitsuba-renderer.org>. 2
- [5] T. Narihira, M. Maire, and S. X. Yu. Direct intrinsics: Learning albedo-shading decomposition by convolutional regression. In *Proceedings of the IEEE International Conference on Computer Vision*, pages 2992–2992, 2015. 1, 2
- [6] K. Rematas, T. Ritschel, M. Fritz, E. Gavves, and T. Tuytelaars. Deep reflectance maps. In *The IEEE Conference on Computer Vision and Pattern Recognition (CVPR)*, June 2016. 1
- [7] O. Ronneberger, P. Fischer, and T. Brox. *U-Net: Convolutional Networks for Biomedical Image Segmentation*, pages 234–241. Springer International Publishing, Cham, 2015. 1
